# Supplementary material for: STALARD: Selective Target Amplification for Low-Abundance RNA Detection
Source: Research Square preprint supplement (doi:10.21203/rs.3.rs-6782090/v1), 2025-06-06
Supplement: Supplementary file 1 [file 9b1a3a8e7712b54f827741b0.xlsx]

## Sheet: Supplementary Table 1
Primers for reverse transcription
Gene locus	Target	Sense	Antisense	Reference
UBCRT	UBC	TTGTGCCATTGAATTGAACCC	-	21
FLCRT	FLC	TTTGTCCAGCAGGTGACATC	-	22
T14WRT	Total COOLAIR	-	TGTATGTGTTCTTCACTTCTGTCAA	22
T23JRT	Total COOLAIR	-	TGTATGTGTTCTTCACTTCTGTCAA	22
P10LRT	Proximal COOLAIR	-	TTTTTTTTTTTTTTTACTGCTTCCA	18
D10LRT	Distal COOLAIR	-	TTTTTTTTTTTTTTTGCGGTACAC
P19FRT	Proximal COOLAIR	-	TGGTTGTTATTTGGTGGTGTG	24
D19FRT	Distal COOLAIR	-	GCCCGACGAAGAAAAAGTAG
VIN3_GSoligo(dT)	mRNA	CTTCTGAATCTTGTGTCTCGTCCTCT24VN	-	This study
FLM_GSoligo(dT)	mRNA	GTCACTTTCTCCAAACGACGCAATGT24VN	-
MAF2_GSoligo(dT)	mRNA	GTCACTTTCTCCAAACGACGCAATGT24VN	-
EIN4_GSoligo(dT)	mRNA	CTGAAAATCCGCAACTGAAACTCCCT24VN	-
ATX2_GSoligo(dT)	mRNA	AGCGTTTACTCCGTTTCCTCTTCCTT24VN	-
COOLAIR_GSoligo(dT)	mRNA	ACGTCCCTGTTGCAAAATAAGCCGTT24VN	-
Primers for qPCR
Name	Target	Forward	Reverse	Reference
UBC	UBC	CTGCGACTCAGGGAATCTTCTAA	TTGTGCCATTGAATTGAACCC	21
FLC spliced	FLC spliced	AGCCAAGAAGACCGAACTCA	TTTGTCCAGCAGGTGACATC	22
Total14Wang (T14W)	Total COOLAIR	TGTATGTGTTCTTCACTTCTGTCAA	GCCGTAGGCTTCTTCACTGT	22
Total23Jeon (T23J)	Total COOLAIR	TCGTGTGAGAATTGCATCGAG	AGCCACGTCCCTGTTGCAAA	This study
Proximal10Liu (P10L)	Proximal COOLAIR	TTTTTTTTTTTTTTTACTGCTTCCA	CACACCACCAAATAACAACCA	18
Distal10Liu (D10L)	Distal COOLAIR	TTTTTTTTTTTTTTTGCGGTACAC	GGGGTAAACGAGAGTGATGC
Proximal19Fang (P19F)	Proximal COOLAIR	CCTGCTGGACAAATCTCCGA	TCACACGAATAAGGTGGCTAATTAAG	24
Distal19Fang (D19F)	Distal COOLAIR	GTATCTCCGGCGACTTGAAC	GGATGCGTCACAGAGAACAG
Proximal21Xu (P21X)	Proximal COOLAIR	TCATCATGTGGGAGCAGAAG	TCTCACACGAATAAGGTGGCTA	41
Distal21Xu (D21X)	Distal COOLAIR	GTATCTCCGGCGACTTGAAC	GGATGCGTCACAGAGAACAG
Proximal22Jeong (P22J)	Proximal COOLAIR	TCACACCACCAAATAACAACCATTA	CTGCTTCCAAACTTAAAAGCTTAAACA	This study
Distal22Jeong (D22J)	Distal COOLAIR	TCGTCGGGCCAGATATTTTTTT	CACGTGGCAATCTTGTCTTCAA
VIN3	VIN3	GTTTCAGGACAAGGTGACAAG	GTAGAAGAAGACGGCTCCTCG
FLM	FLM-β	TCCGGAAAACTCTATGACTCTTC	TCTGAATTTTTTCTTCAAGATCTAAGGC
	FLM-δ	TCCGGAAAACTCTATGACTCTTC	TCTGAATTTTTTCTTCAAGATCGAGTTC
MAF2	MAF2.5	AAGAGTTACTAGAAATAGTCCAAAGTGT	CATCATTAGTTCTGTCTTCCTAGC
	MAF2var1	TGATGAACTTGAAGCCTTAGATCTTG	AGTATCCACACTTGCATTATCGACA
EIN4	EIN4.1	TTTCTCTGATTACCTTCCCCTGG	CCAATGAGATTAAACAACTCCAAACAC
	EIN4.2	CTTACTAGATTCGAGAGTACTACGA	CCAATGAGATTAAACAACTCCAAACAC
ATX2	ATX2.1	ACAAGAGGCACATTACAATCTTTG	CCATCGTGTATAAAGAACCTGATCA
	ATX2.3	AGAGTTTGTTCTTTGCAGCTACT	AGTCATCTTCTTCAATGGAGATAAG
Primers for STALARD amplification
Gene locus	Target	Forward and reverse		Reference
VIN3_GSP	VIN3	CTTCTGAATCTTGTGTCTCGTCCTC		This study
FLM_GSP	FLM	GTCACTTTCTCCAAACGACGCAATG
MAF2_GSP	MAF2	GTCACTTTCTCCAAACGACGCAATG
EIN4_GSP	EIN4	CTGAAAATCCGCAACTGAAACTCCC
ATX2_GSP	ATX2	AGCGTTTACTCCGTTTCCTCTTCCT
COOLAIR_GSP	COOLAIR	ACGTCCCTGTTGCAAAATAAGCCGT
