# Supplementary material for: STALARD: Selective Target Amplification for Low-Abundance RNA Detection
Source: Research Square preprint supplement (doi:10.21203/rs.3.rs-6782090/v1), 2025-06-06
Supplement: Supplementary file 2 [file d884ba2a4efbe56b94ddaf38.docx]

**Supplementary Figures**

**Supplementary Figure 1**


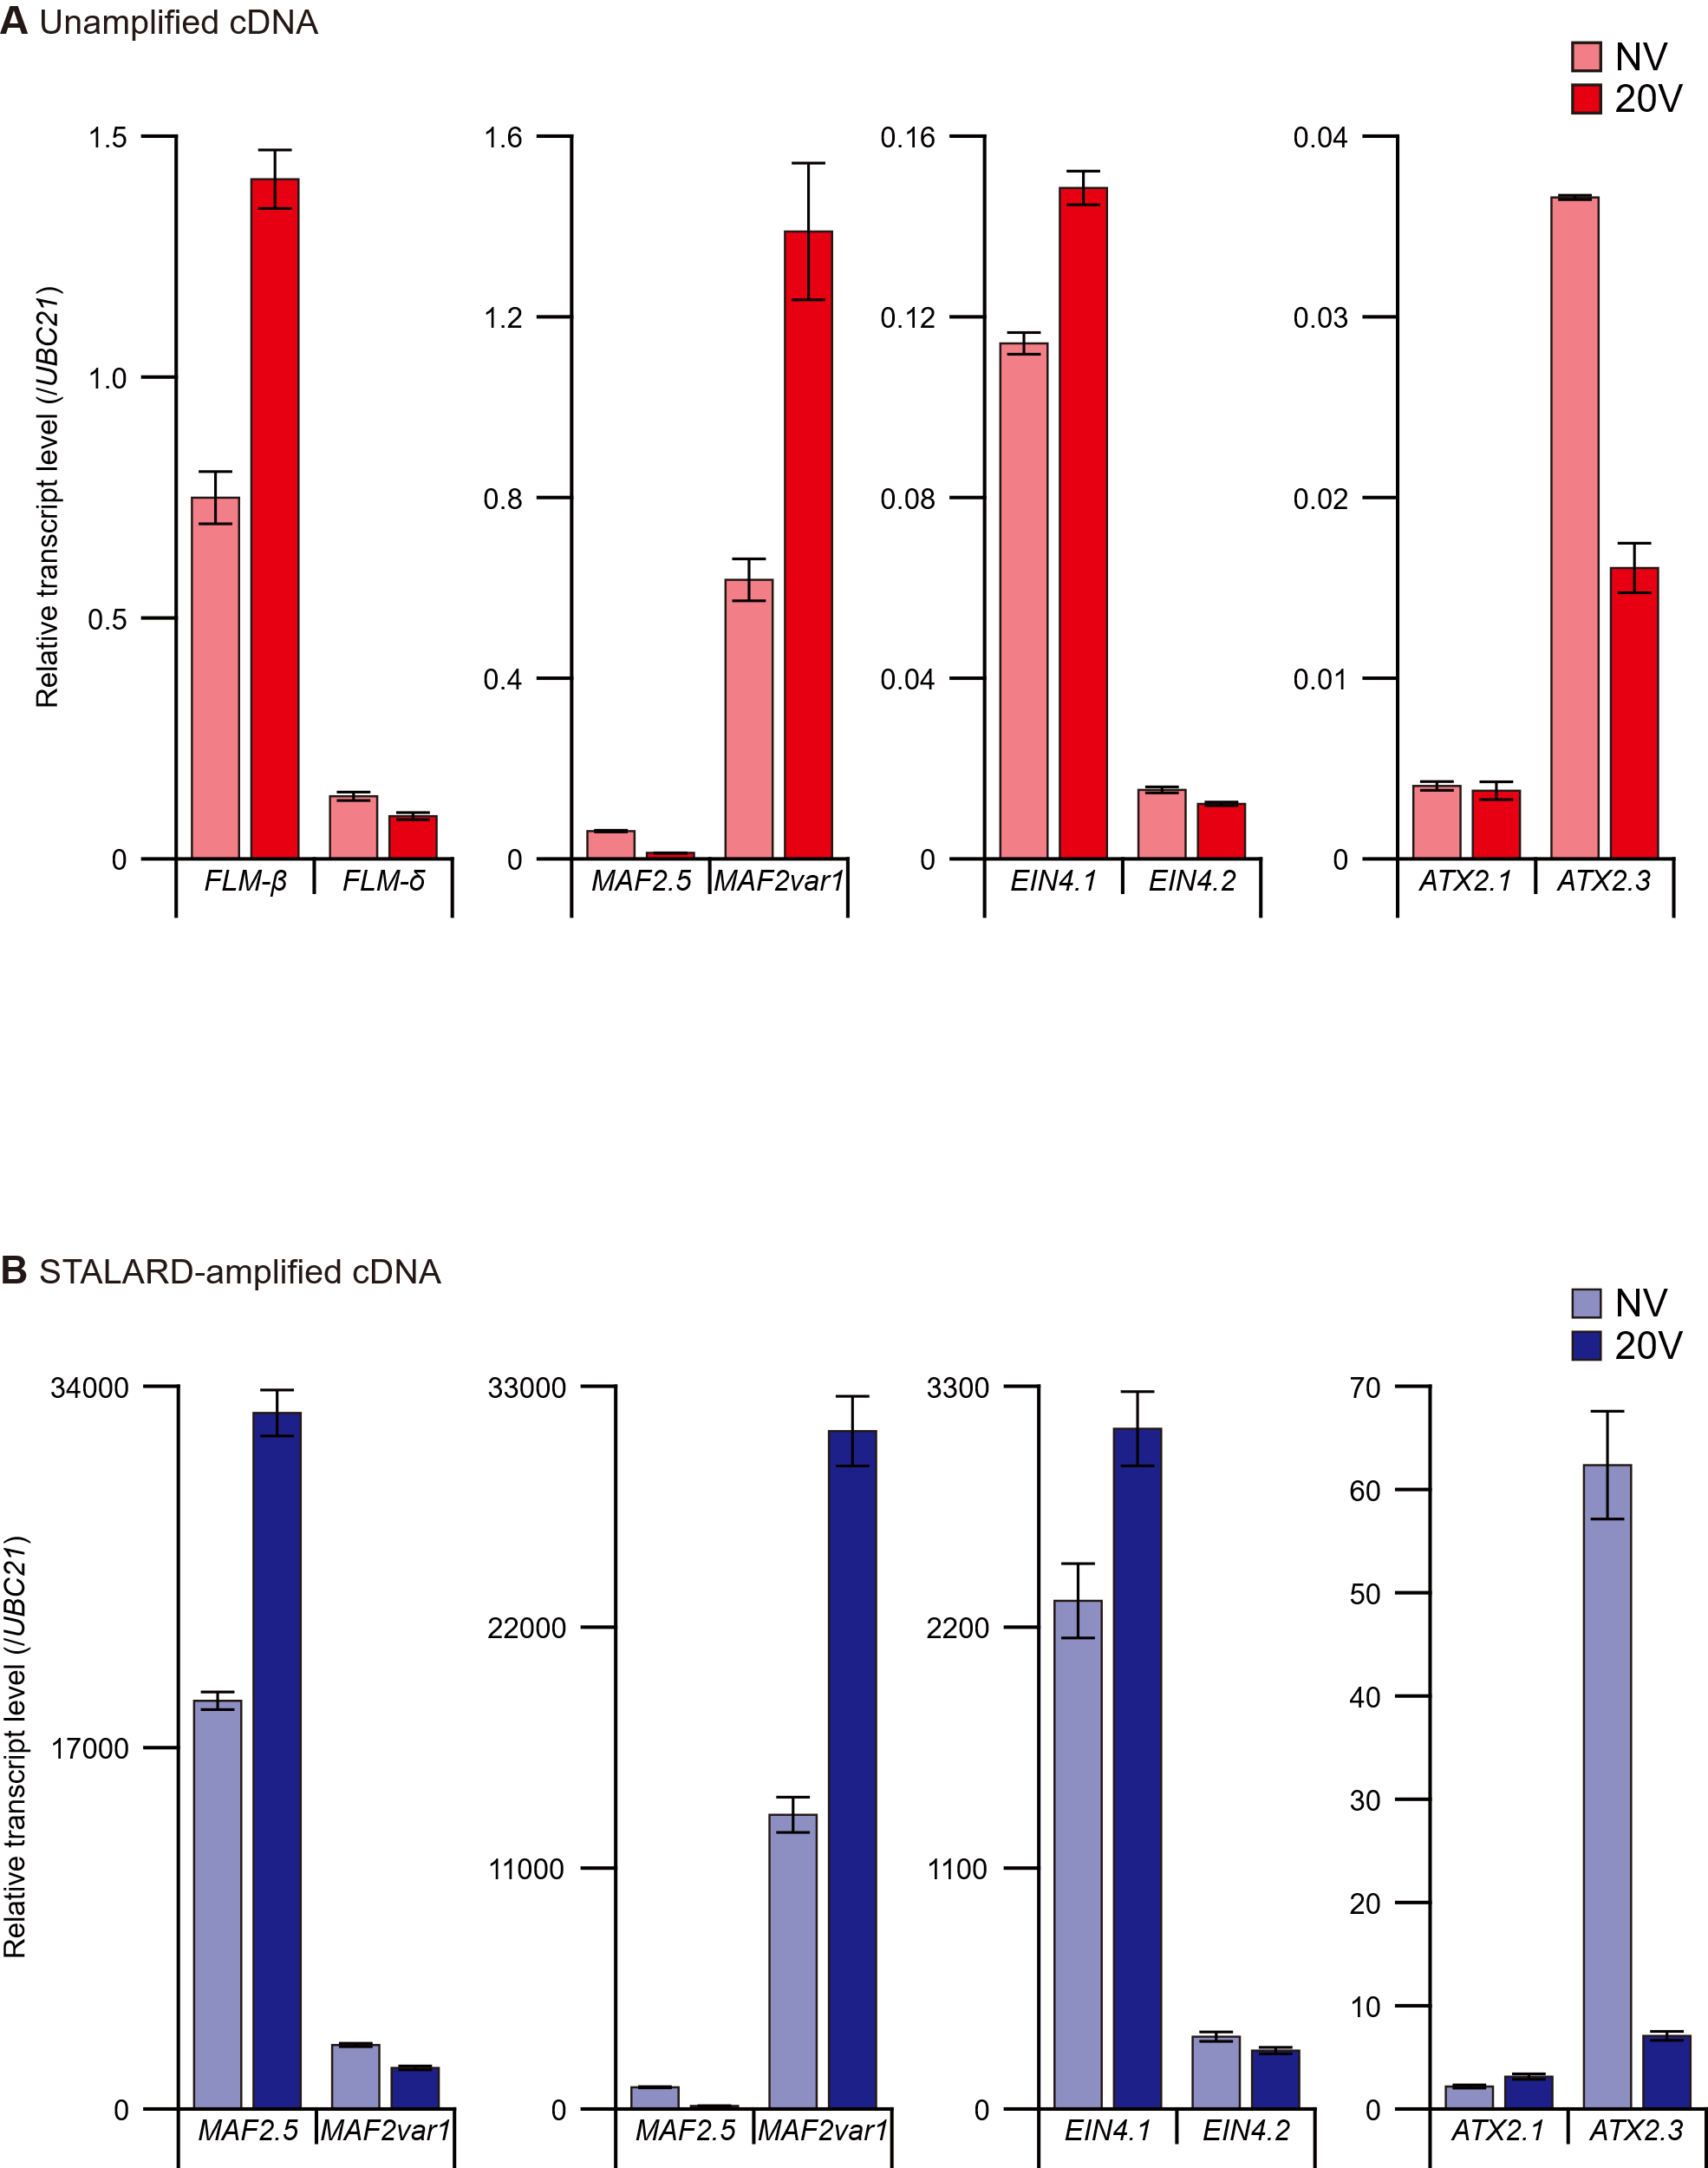


**Supplementary Figure 1.** Relative transcript levels of alternatively spliced isoforms. **A**. Relative transcript levels of alternatively spliced isoforms under NV and 20V conditions, measured using first-strand cDNA. Data are presented as mean ± SEM from three biological replicates. **B**. Relative transcript levels of alternatively spliced isoforms under NV and 20V conditions in STALARD-amplified samples. Data are presented as mean ± SEM from three biological replicates.

**Supplementary Figure 2**


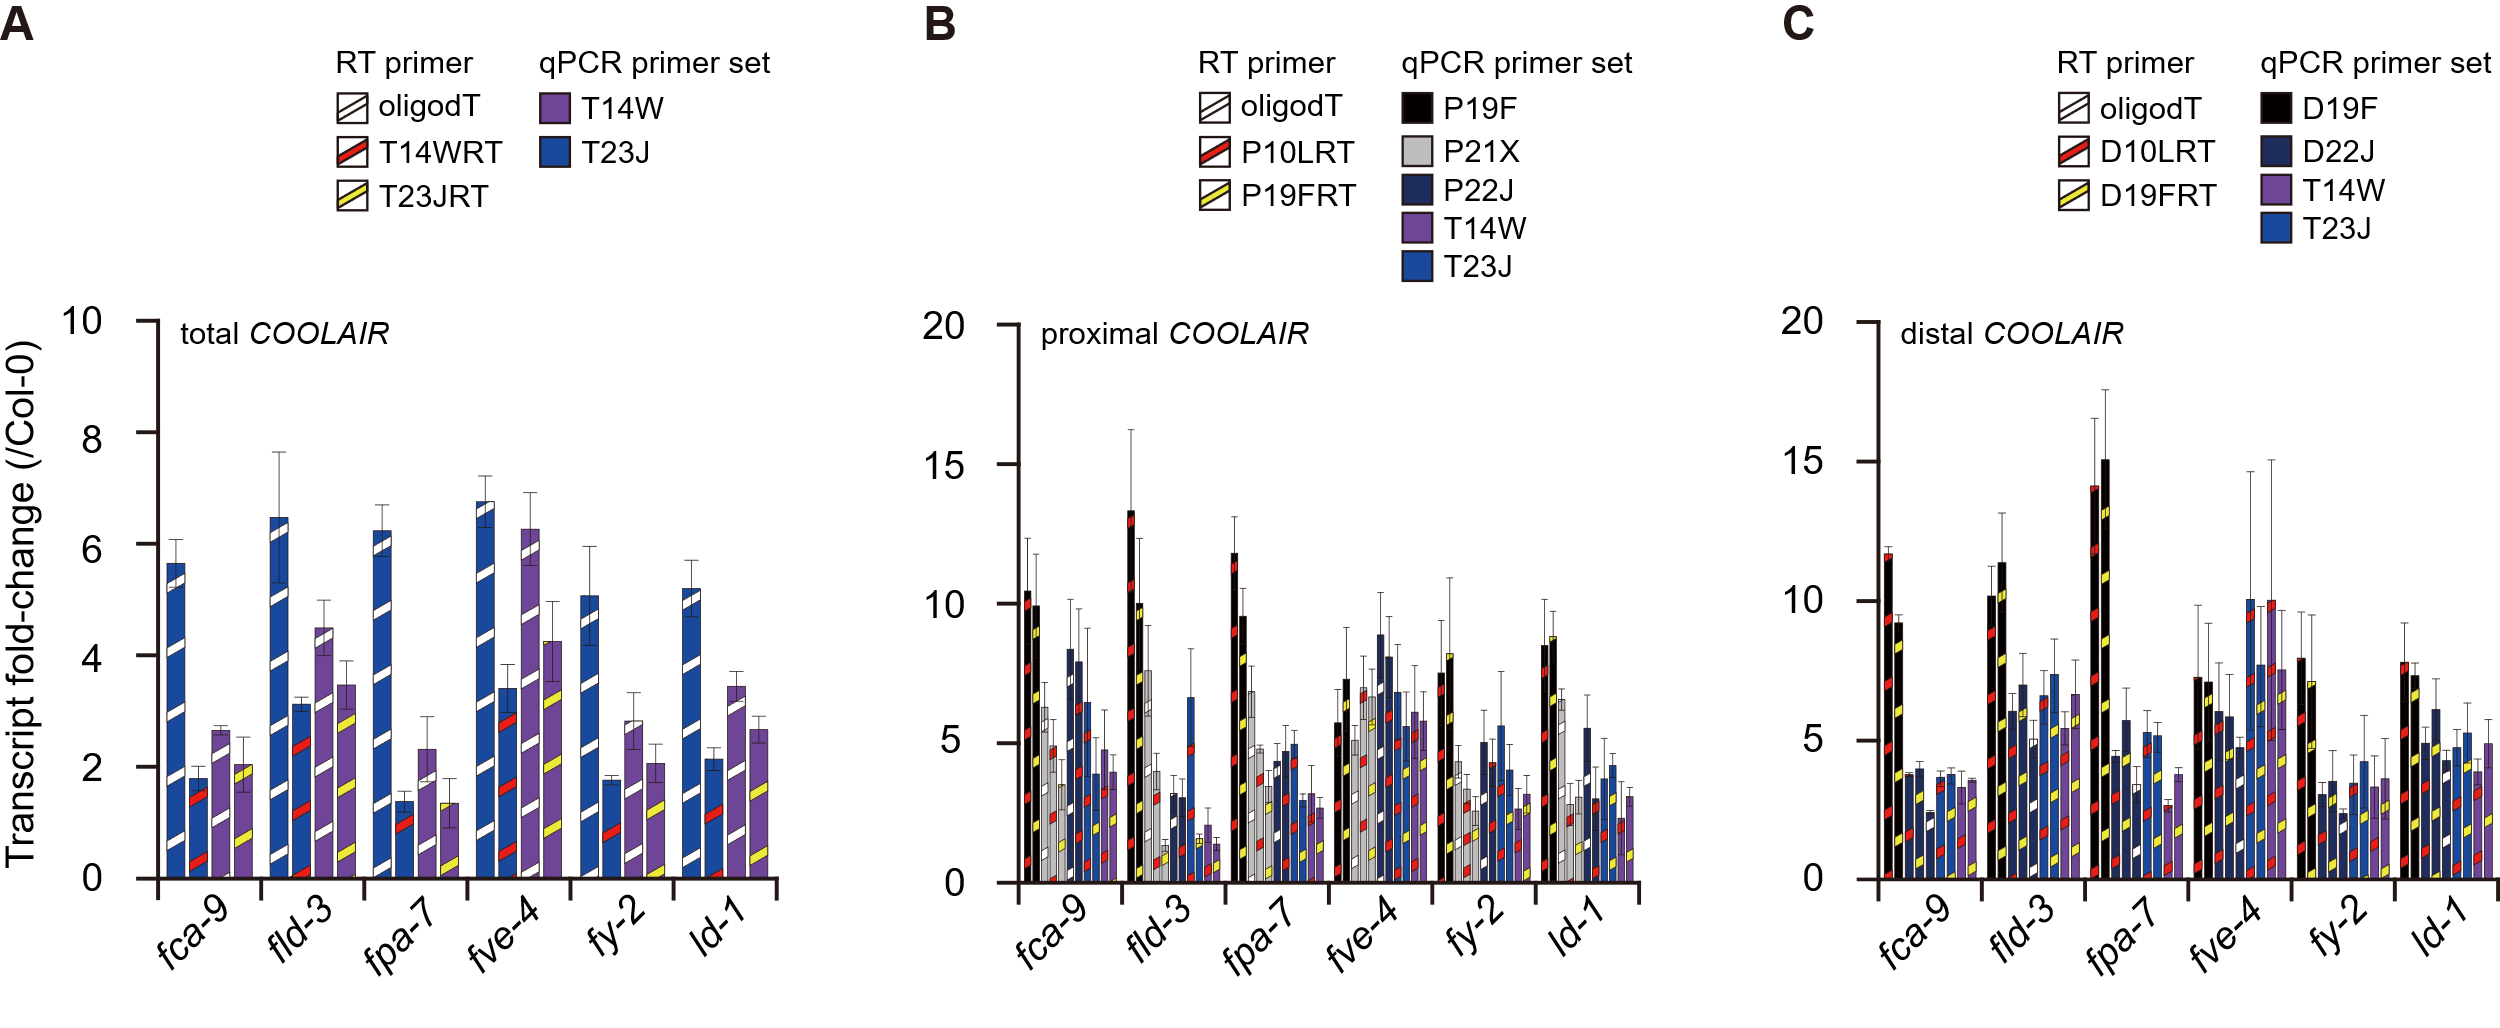


**Supplementary Figure 2.** Fold changes of *COOLAIR* transcripts. Fold change in total *COOLAIR* (**A**), proximal *COOLAIR* (**B**), and distal *COOLAIR* (**C**) transcript levels in AP mutants, compared to Col-0, quantified by RT-qPCR using various primer sets. Data are presented as mean ± SEM from three biological replicates.
